# Supplementary material for: H2S detection at low temperatures by Cu2O/Fe2O3 heterostructure ordered array sensors
Source: PubMed Central journal article supplement — RSC Adv. 2020 Feb 26;10(14):8332–9. doi: 10.1039/c9ra10054g (PMC9049979; doi:10.1039/c9ra10054g), 2020-02-26
Supplement: RA-010-C9RA10054G-s001.pdf [file RA-010-C9RA10054G-s001.pdf]

**Supplementary Information for**  
**H<sub>2</sub>S detection at low temperatures by Cu<sub>2</sub>O/Fe<sub>2</sub>O<sub>3</sub> heterostructure**  
**ordered array sensors**

Pinhua Zhang<sup>†a</sup>, Hongyang Zhu<sup>†a</sup>, Kaifeng Xue<sup>b</sup>, Li Chen<sup>a</sup>, Changmin Shi<sup>a</sup>, Dongchao Wang<sup>a</sup>, Jianfu Li<sup>a</sup>, Xiaoli Wang<sup>\*a</sup>, Guangliang Cui<sup>\*a</sup>

<sup>a</sup> School of Physics and Electrical Engineering, Linyi University, Linyi 276005, China

<sup>b</sup> School of Mechanical & Vehicle Engineering, Linyi University, Linyi 276005, China

\* Corresponding authors.

E-mail address: cuiguangliang@lyu.edu.cn (G. Cui), wxl@lyu.edu.cn (X. Wang)

<sup>†</sup> These authors contributed equally to this work.

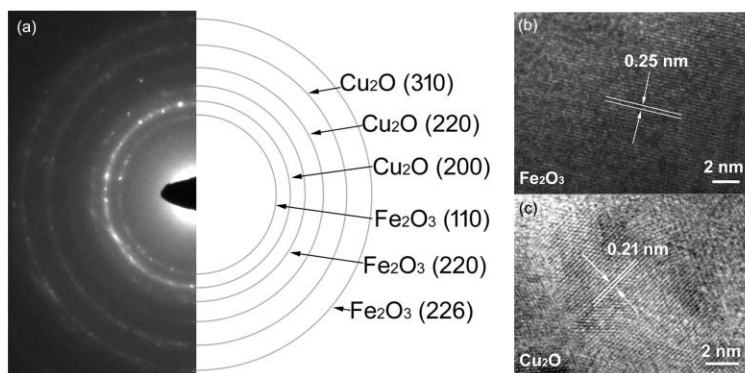

Fig. S1. (a) SAED pattern of  $\text{Cu}_2\text{O}/\text{Fe}_2\text{O}_3$  heterostructure ordered arrays, the diffraction rings are corresponding to  $\text{Cu}_2\text{O}$  and  $\text{Fe}_2\text{O}_3$ . (b) and (c) are HRTEM images of  $\text{Fe}_2\text{O}_3$  and  $\text{Cu}_2\text{O}$ .

The selected area electron diffraction (SAED) pattern of  $\text{Cu}_2\text{O}/\text{Fe}_2\text{O}_3$  heterostructure ordered arrays (Fig. S1a) demonstrates a typical ring structure characteristic for polycrystalline materials and agrees well with the structure of  $\text{Cu}_2\text{O}$  and  $\text{Fe}_2\text{O}_3$ . The atomic planes (200), (220), (310) of  $\text{Cu}_2\text{O}$  and (110), (220), (226) of  $\text{Fe}_2\text{O}_3$  can be fully indexed. The high resolution transmission electron microscopy (HRTEM) images of  $\text{Cu}_2\text{O}/\text{Fe}_2\text{O}_3$  heterostructure ordered arrays was characterized and supplied in Fig. S1b and c. The spacings of the fringes were measured to be 0.25 nm for  $\text{Fe}_2\text{O}_3$  and 0.21 nm for  $\text{Cu}_2\text{O}$ , corresponding to the (110) plane of  $\text{Fe}_2\text{O}_3$  and the (200) plane of  $\text{Cu}_2\text{O}$ . The results well agree with the SAED.

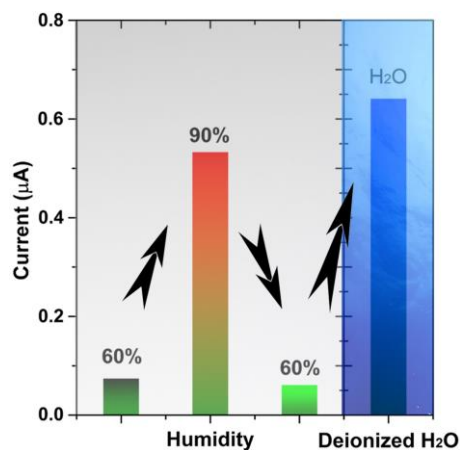

Figure S2. The conductance change of the sensor based on  $\text{Cu}_2\text{O}/\text{Fe}_2\text{O}_3$  heterostructure ordered array as humidity increases from 60% to 90% and falls back to 60%, as well as the surface of the sensor covered by deionized  $\text{H}_2\text{O}$ . The bias voltage is 20 V.

During the H<sub>2</sub>S sensing test, the humidity of analyte H<sub>2</sub>S was kept in range of 50±10%. To evaluate the influence of humidity on H<sub>2</sub>S sensing, a series of humidity sensing based on Cu<sub>2</sub>O/Fe<sub>2</sub>O<sub>3</sub> heterostructure ordered array were done within a relative humidity of 60%-90% under a bias voltage of 20 V at room temperature, as well as deionized water condations.

During the testing process, the humidity in the test chamber was pre-adjusted to 60%, then the sensor was put in and tested. Upon completion of testing, the sensor was removed to the atmospheric environment (humidity: ~50%). The repeat tests were carried out when the humidity adjusted to 90% and 60%, respectively. Finally, the response to deionized water of the same sensor was characterized.

As shown in Fig. S2, the conductance increases slightly as the humidity varying from 60% to 90%, and the conductance restore to initial state as the humidity falls back to 60%. Even the surface of the sensor is covered by deionized water, the conductance still keep the same order of magnitude with that of 60% humidity. Therefore, we can conclude that the response of the sensor to humidity within a range of 40-60% is limited. This is to say that the conductance change of the sensor caused by the varying humidity could be ignored compared with the response of H<sub>2</sub>S.
